# Supplementary material for: Explainable AI for unveiling deep learning pollen classification model based on fusion of scattered light patterns and fluorescence spectroscopy
Source: PubMed Central journal article supplement (PMC9958198; doi:10.1038/s41598-023-30064-6), 2023-02-24
Supplement: 41598_2023_30064_MOESM1_ESM.pdf [file 41598_2023_30064_MOESM1_ESM.pdf]

# Explainable AI for unveiling deep learning pollen classification models based on fusion of scattered light patterns and fluorescence spectroscopy - Supplementary Materials

Sanja Brdar<sup>1</sup>, Marko Panić<sup>1</sup>, Predrag Matavulj<sup>1</sup>, Mira Stanković<sup>2</sup>, Dragana Bartolić<sup>2</sup>, and Branko Šikoparija<sup>1</sup>

<sup>1</sup>BioSense Institute – Research Institute for Information Technologies in Biosystems, University of Novi Sad, Novi Sad, Serbia

<sup>2</sup>Institute for Multidisciplinary Research, University of Belgrade, Belgrade, Serbia

## Pollen sizes

| Label      | Pollen species                                     | Polar view average size (standard deviation) | Equatorial view average size (standard deviation) |
|------------|----------------------------------------------------|----------------------------------------------|---------------------------------------------------|
| Acer       | <i>Acer negundo</i> L.                             | 32 (8) micron                                | 22 (4) micron                                     |
| Alnus      | <i>Alnus glutinosa</i> (L.) Gaertn.                | 27 (1) micron                                | 24 (2) micron                                     |
| Alopecurus | <i>Alopecurus pratensis</i> L.                     | 36 (2) micron                                | 30 (2) micron                                     |
| Carex      | <i>Carex</i> sp.                                   | 52 (2) micron                                | 44 (4) micron                                     |
| Cupressus  | <i>Cupressus arizonica</i> Greene                  | 22 (1) micron                                | 21 (7) micron                                     |
| Dactylis   | <i>Dactylis glomerata</i> L.                       | 34 (3) micron                                | 32 (4) micron                                     |
| Juglans    | <i>Juglans regia</i> L.                            | 46 (3) micron                                | 41 (4) micron                                     |
| Morus      | <i>Morus</i> sp.                                   | 22 (2) micron                                | 16 (2) micron                                     |
| Platanus   | <i>Platanus x acerifolia</i> (Aiton) Willd.        | 22 (3) micron                                | 18 (2) micron                                     |
| Populus 1  | <i>Populus nigra</i> var. <i>pyramidalis</i> Spach | 25 (2) micron                                | 22 (2) micron                                     |
| Populus 2  | <i>Populus alba</i> L.                             | 30 (2) micron                                | 25 (3) micron                                     |
| Salix      | <i>Salix</i> sp.                                   | 25 (4) micron                                | 17 (1) micron                                     |
| Ulmus      | <i>Ulmus</i> sp.                                   | 30 (2) micron                                | 26 (3) micron                                     |

Supplementary Table 1: Measured averaged pollen sizes of examined pollen classes.

# Instance level explanations - examples of misclassifications

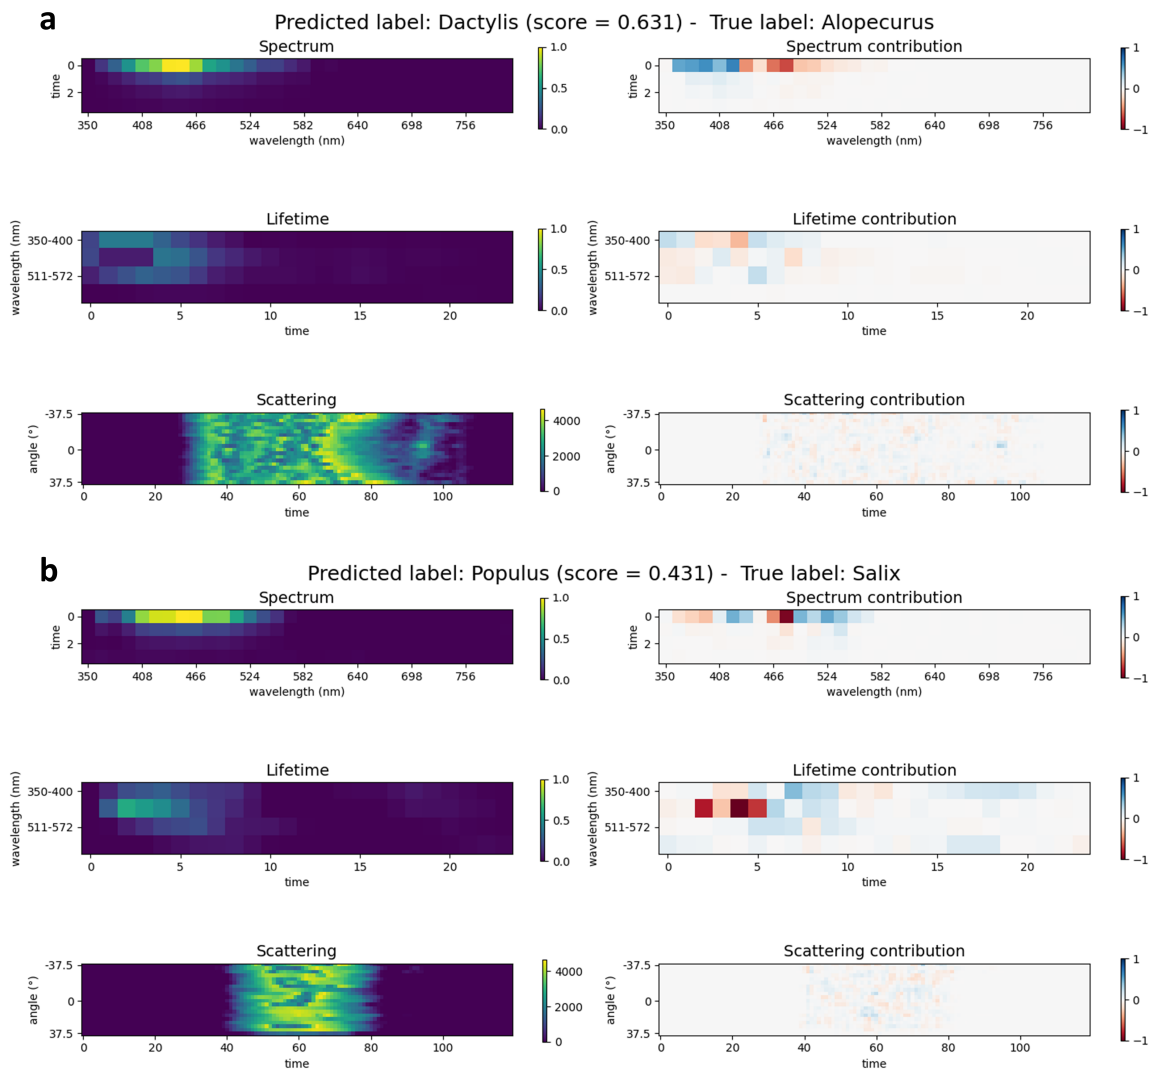

Supplementary Figure 1: Examples where classifier wrongly predicts test instances.

# Model level explanation - spectrum attributions

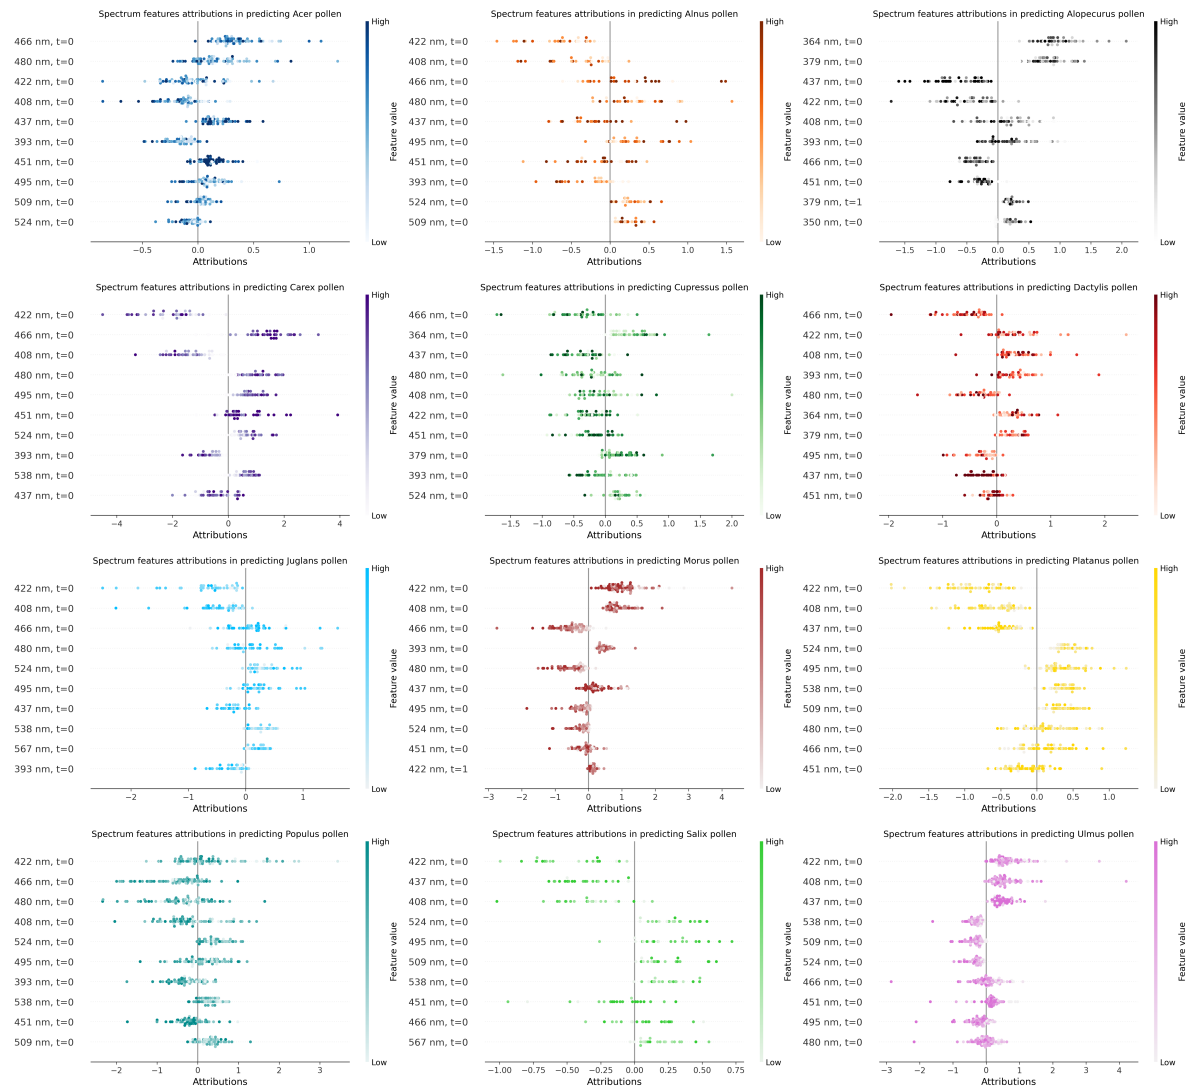

Supplementary Figure 2: Ranked attributions of top 10 spectrum features.

# Model level explanation - lifetime attributions

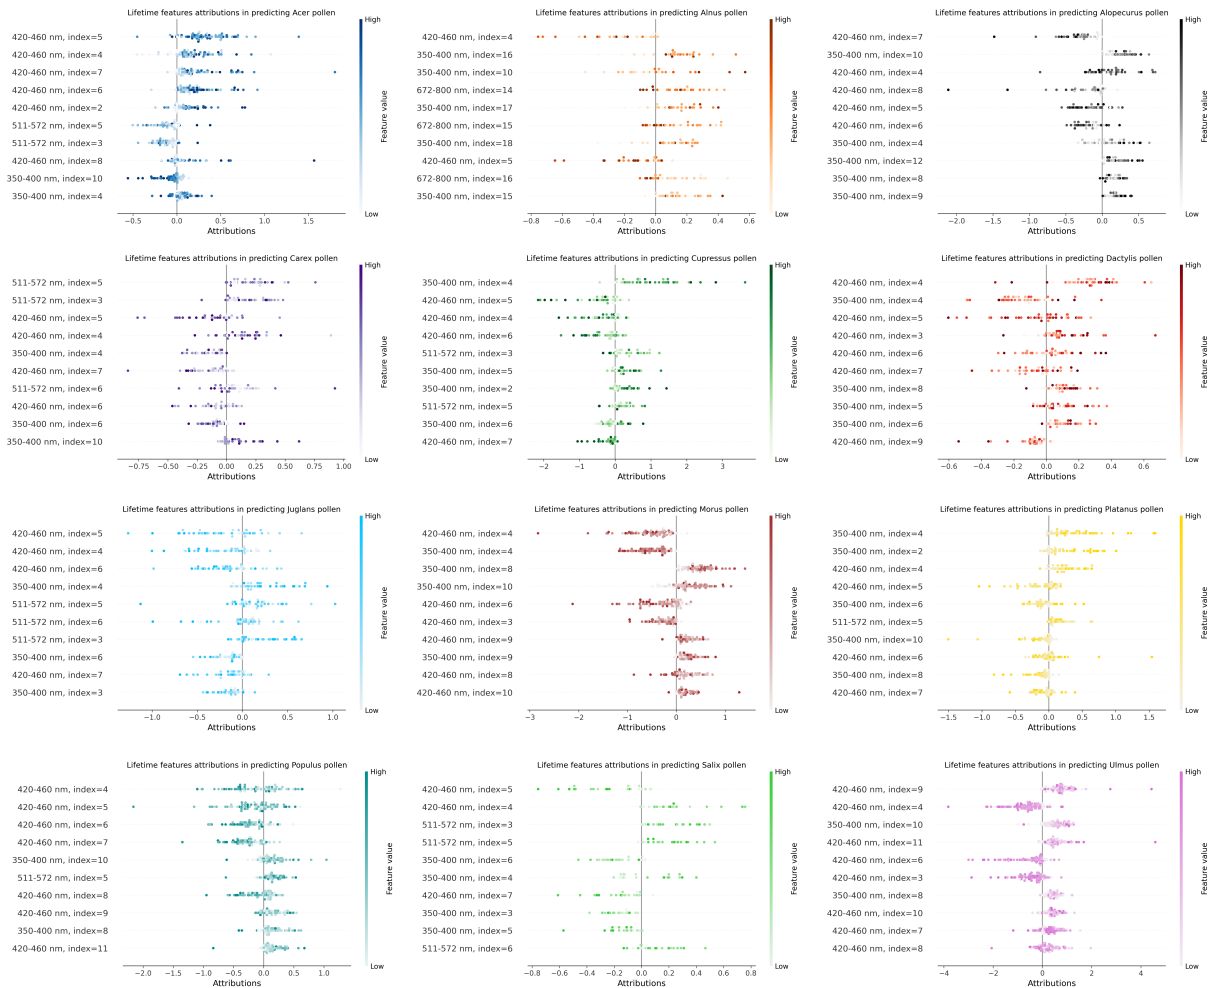

Supplementary Figure 3: Ranked attributions of top 10 lifetime features.



# Model level explanation - scattering attributions

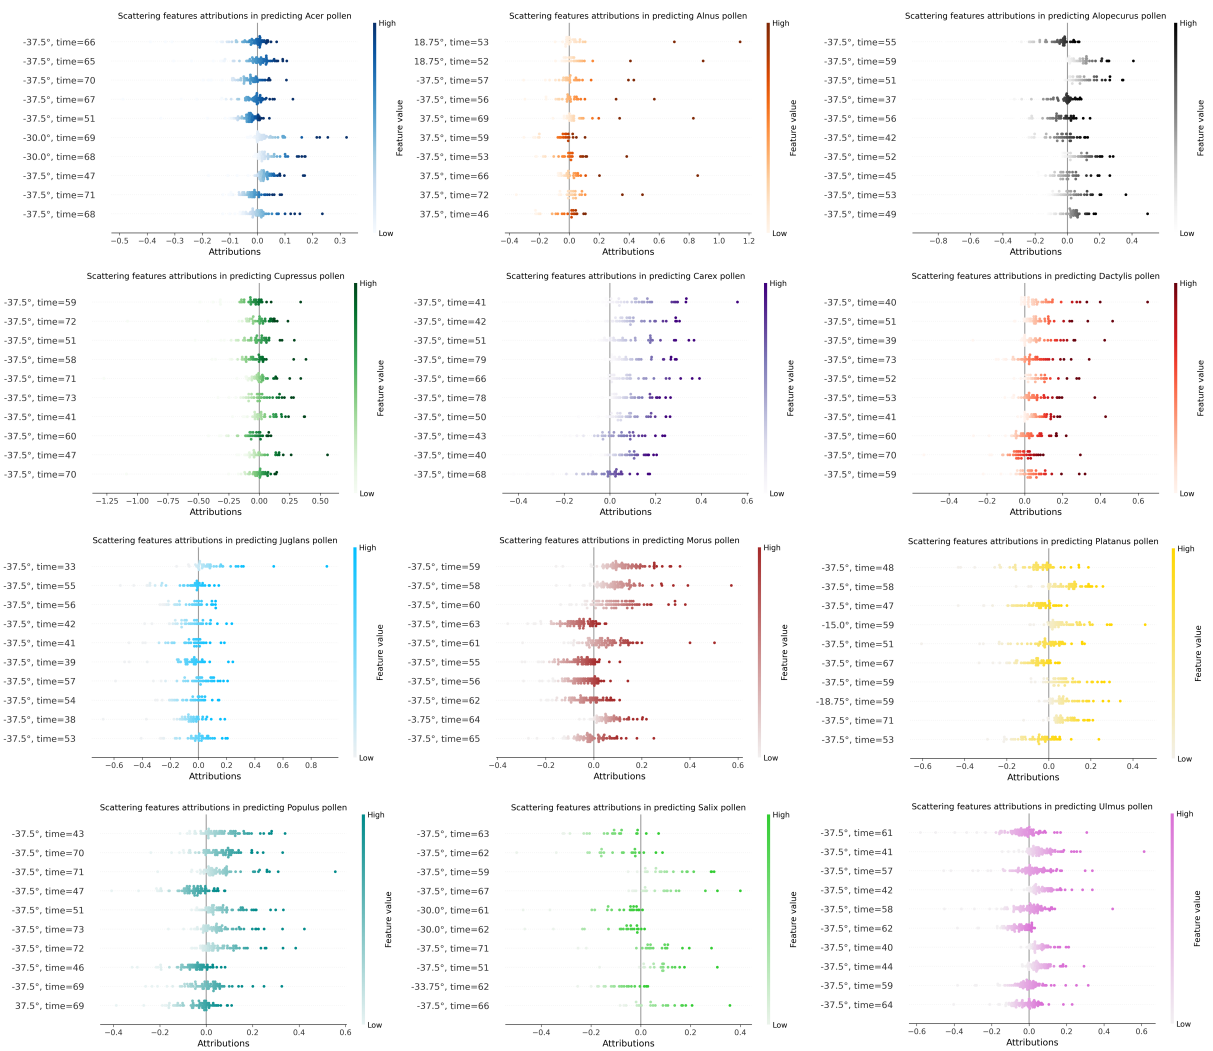

Supplementary Figure 4: Ranked attributions of top 10 scattering features.

# Model level explanation - lifetime derived features attributions

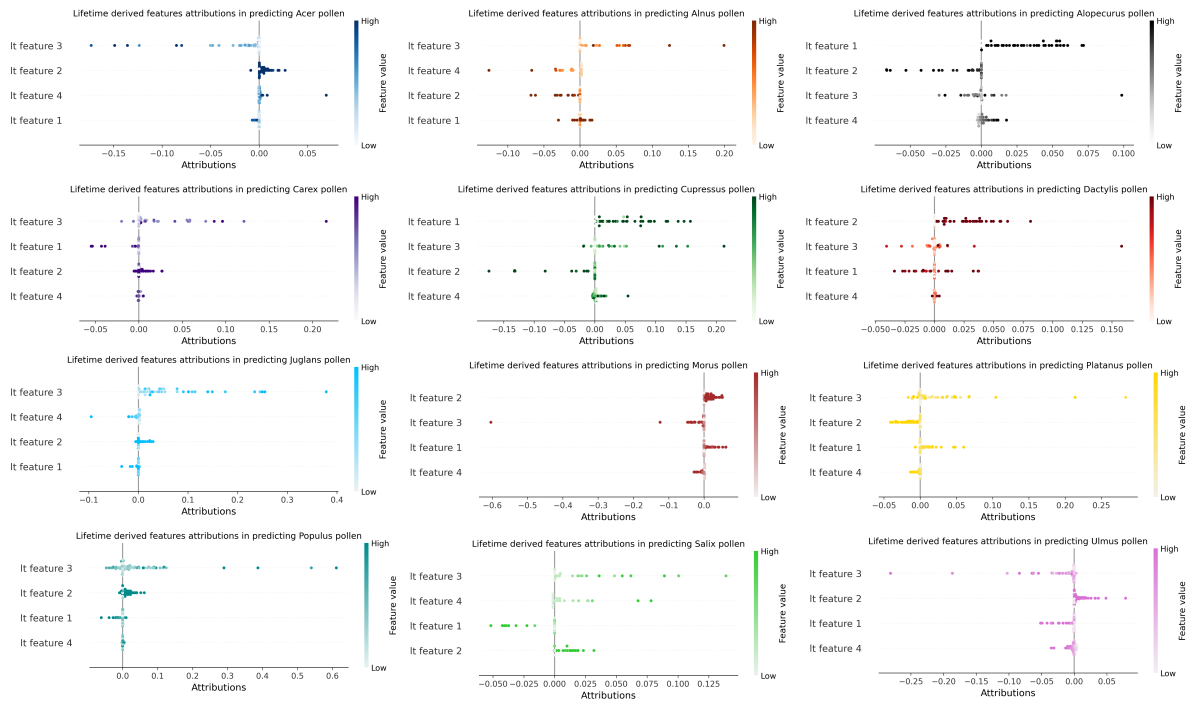

Supplementary Figure 5: Ranked attributions of lifetime derived features.

# Model level explanation - size feature attributions

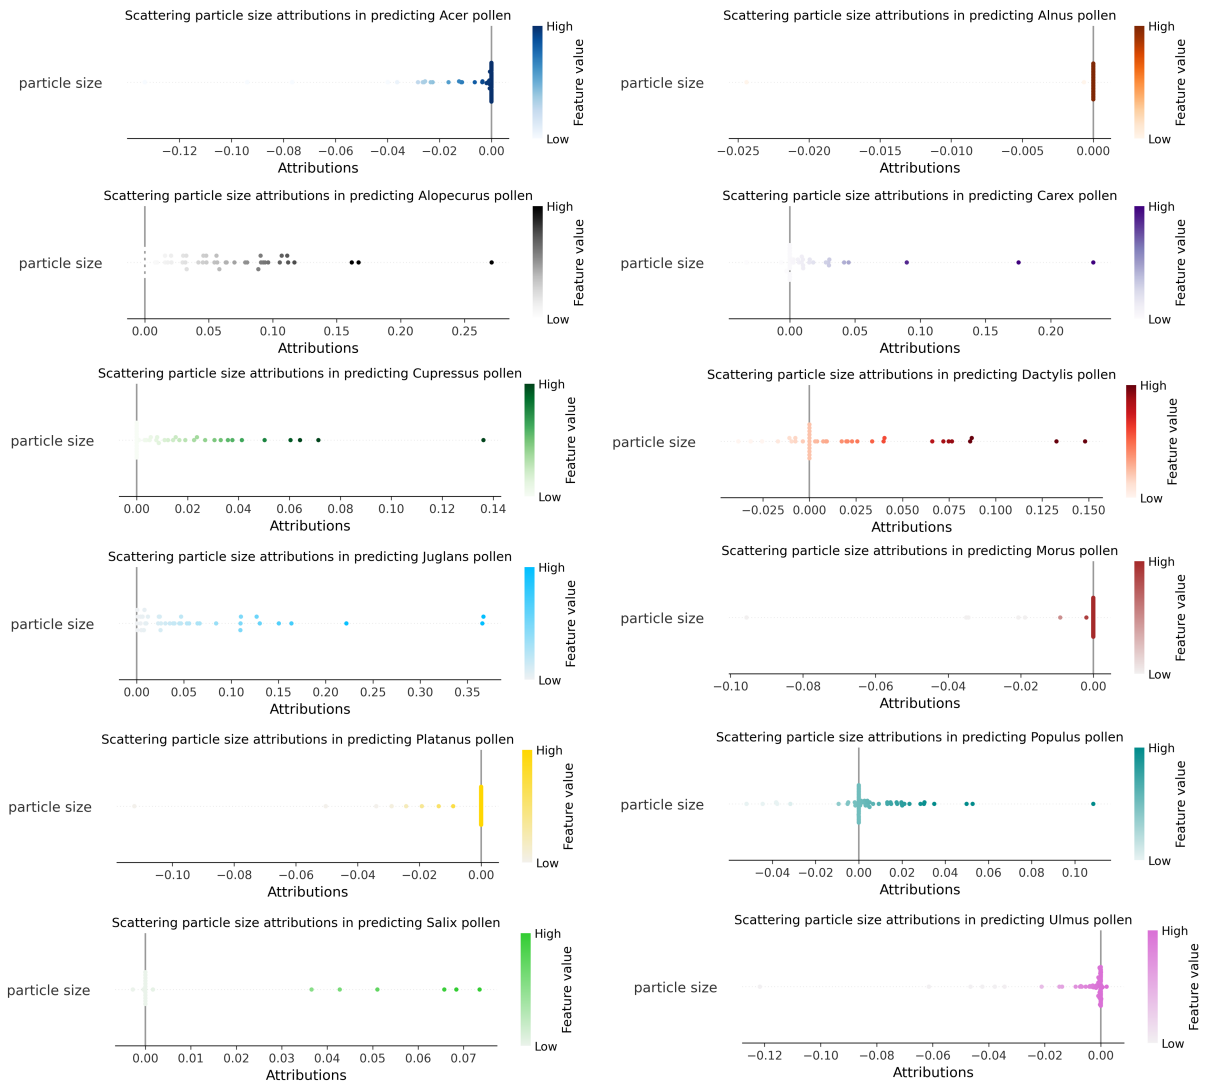

Supplementary Figure 6: Attributions of scattering derived feature - size.
